# Supplementary material for: RHOBTB3 promotes proteasomal degradation of HIFα through facilitating hydroxylation and suppresses the Warburg effect
Source: PubMed Central journal article supplement — Cell Res. 2015 Jul 28;25(9):1025–42. doi: 10.1038/cr.2015.90 (PMC4559813; doi:10.1038/cr.2015.90), 2015-07-28
Supplement: cr201590x2.pdf [file cr201590x2.pdf]

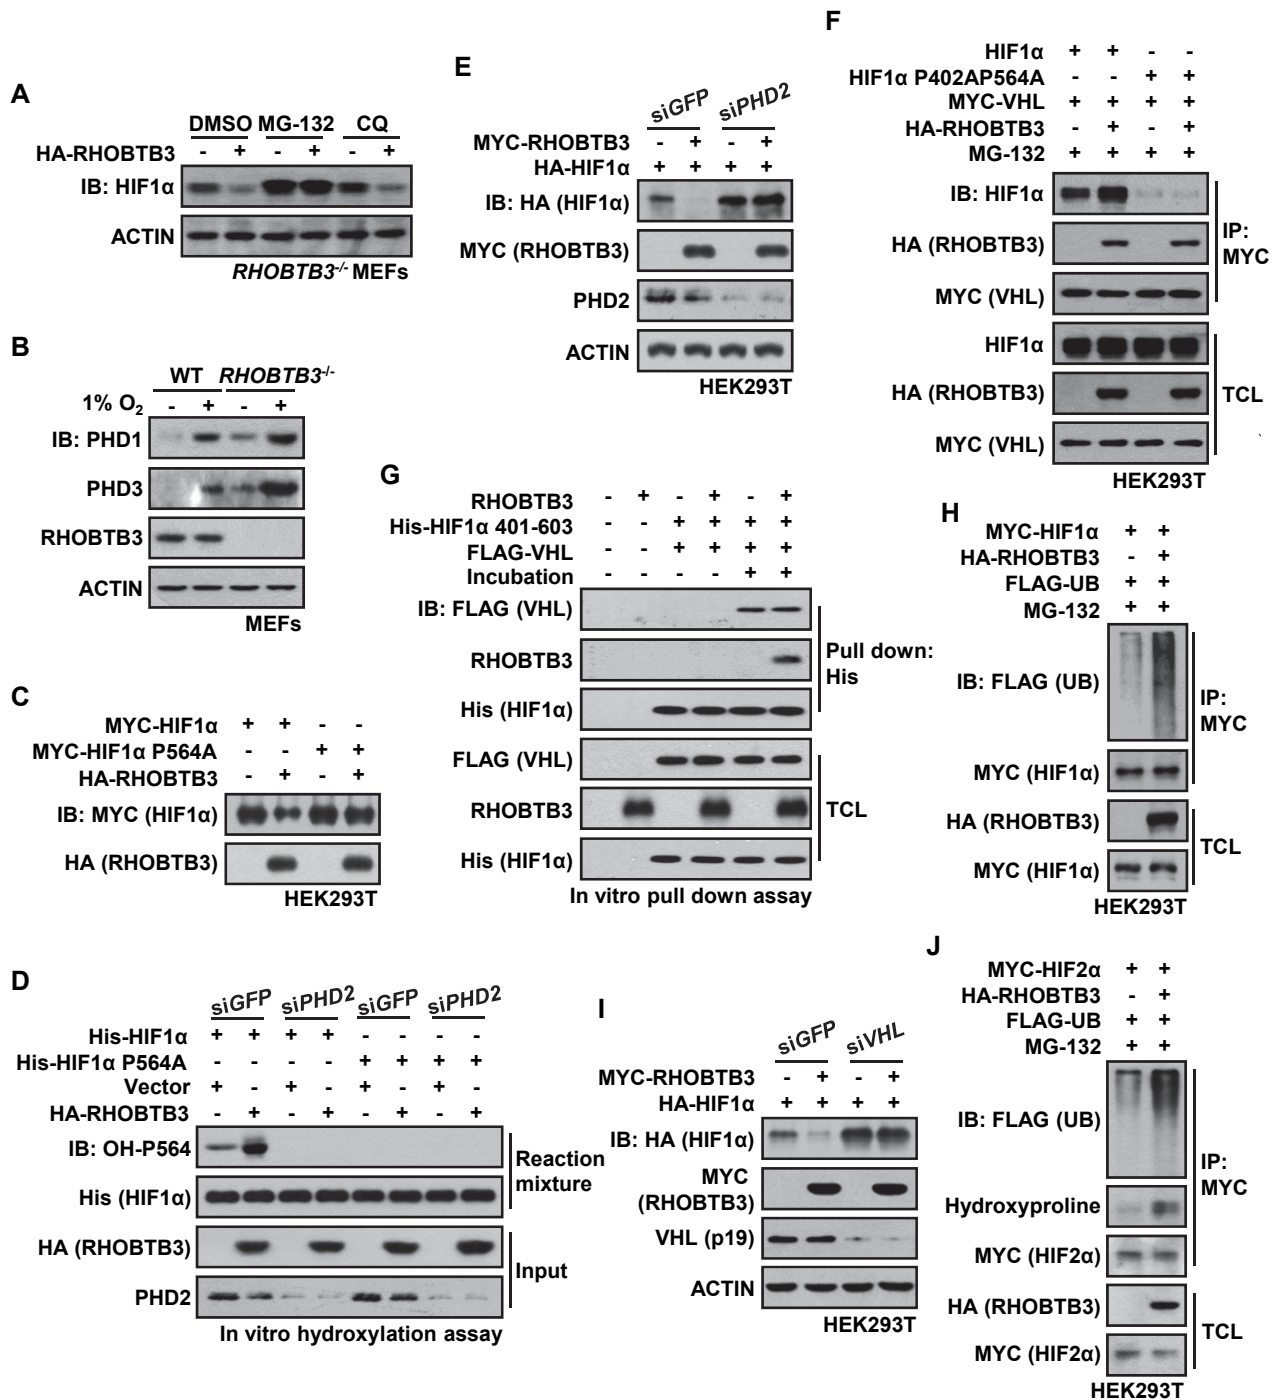

### Supplementary information, Figure S2

(A) RHOBTB3 promotes HIF1 $\alpha$  degradation in a proteasome-specific manner. *RHOBTB3*<sup>-/-</sup> MEFs were infected by lentivirus expressing HA-RHOBTB3 or blank vector as a control. At 16 h post-infection, cells were treated with 10  $\mu$ M MG-132 or 200  $\mu$ M chloroquine (CQ) and maintained under normoxia or exposed to hypoxia for 10 h, then lysed and analyzed by immunoblotting with antibodies indicated.

(B) The expression levels of PHD1 and PHD3 are increased in *RHOBTB3*<sup>-/-</sup> MEFs. *RHOBTB3*<sup>-/-</sup> MEFs and control (WT) MEFs were maintained in normoxia or exposed to hypoxia for 8 h. Cells were then lysed and analyzed by immunoblotting with antibodies indicated.

(C) RHOBTB3 has little effect on the stability of HIF1 $\alpha$  P564A mutant. HEK293T cells in 6-well plates were transfected with 0.8  $\mu$ g of MYC-HIF1 $\alpha$ , 1.5  $\mu$ g of MYC-HIF1 $\alpha$  P564A, and 1  $\mu$ g of HA-RHOBTB3 in different combinations. At 16 h post-transfection, cells were lysed and analyzed by immunoblotting with antibodies indicated.

(D) Knockdown of *PHD2* strongly attenuates RHOBTB3-enhanced hydroxylation of HIF1 $\alpha$  in vitro. HEK293T cells infected by lentivirus carrying *GFP* or *PHD2* siRNA were transfected with HA-RHOBTB3 or vector as a control. At 16 h post-infection, cell lysates were then prepared and incubated with nickel affinity resin-bound bacterially expressed His-HIF1 $\alpha$  (aa 401-603) or its P564A mutant for 90 min at 30 ° C. The mixtures were then added with an equal volume of 2  $\times$  SDS buffer, followed by immunoblotting with antibodies indicated.

(E) Ectopically expressed RHOBTB3 depends on PHD2 to downregulate HIF1 $\alpha$ . HEK293T cells infected by lentivirus expressing siRNA to target *GFP* or *PHD2* were transfected with MYC-RHOBTB3, HA-HIF1 $\alpha$  or vector as a control. At 16 h post-infection, cells were lysed, followed by immunoblotting with antibodies indicated.

(F) Ectopically expressed RHOBTB3 does not promote the interaction between VHL and the P402AP564A mutant of HIF1 $\alpha$ . HEK293T cells were transfected with different combinations of HIF1 $\alpha$ , HIF1 $\alpha$  P402AP564A and HA-RHOBTB3. At 8 h post-transfection, cells were treated with 10  $\mu$ M MG-132 for 10 h and the lysates were immunoprecipitated with antibody against MYC, followed by immunoblotting.

(G) In vitro-translated RHOBTB3 has no effect on the interaction between bacterially expressed ODD domain of HIF1 $\alpha$  and VHL. The nickel affinity resin-bound bacterially expressed His-HIF1 $\alpha$  (aa 401-603) was preincubated in the 50  $\mu$ g of cytoplasmic extract (incubation) as described previously [70] or not. The resin was then incubated with in vitro-translated RHOBTB3 and immunoprecipitated FLAG-VHL overexpressed in HEK293T cells then eluted by FLAG peptide. The mixtures were then pulled down by centrifugation, followed by immunoblotting with antibodies indicated.

(H) RHOBTB3 promotes ubiquitination of HIF1 $\alpha$ . HEK293T cells were transfected with different combinations of MYC-HIF1 $\alpha$ , HA-RHOBTB3 and FLAG-UB. At 8 h post-transfection, cells were treated with 10  $\mu$ M MG-132 for 10 h and the lysates were immunoprecipitated with antibody against MYC to pull down HIF1 $\alpha$ , followed by immunoblotting as described in Figure 2G.

(I) Ectopically expressed RHOBTB3 fails to downregulate HIF1 $\alpha$  in the absence of VHL. HEK293T cells infected by lentivirus carrying siRNA targeting *GFP* or *VHL* were transfected with MYC-RHOBTB3, HA-HIF1 $\alpha$  or vector as a control. Cells were then lysed and the protein levels of HIF1 $\alpha$  were analyzed as described in (E).

(J) RHOBTB3 promotes the ubiquitination and hydroxylation of HIF2 $\alpha$ . HEK293T cells were transfected with different combinations of MYC-tagged HIF2 $\alpha$ , FLAG-tagged UB and HA-tagged RHOBTB3. At 16 h post-transfection, cells were treated with 10  $\mu$ M MG-132 for another 10 h, and were then lysed with RIPA buffer containing 1% SDS and boiled. The protein extracts were diluted with RIPA buffer without SDS to a final concentration of 0.2% SDS, and were subjected to IP with antibody against MYC for HIF2 $\alpha$ , followed by immunoblotting with antibodies indicated.
