# Supplementary material for: RHOBTB3 promotes proteasomal degradation of HIFα through facilitating hydroxylation and suppresses the Warburg effect
Source: PubMed Central journal article supplement — Cell Res. 2015 Jul 28;25(9):1025–42. doi: 10.1038/cr.2015.90 (PMC4559813; doi:10.1038/cr.2015.90), 2015-07-28
Supplement: cr201590x4.pdf [file cr201590x4.pdf]

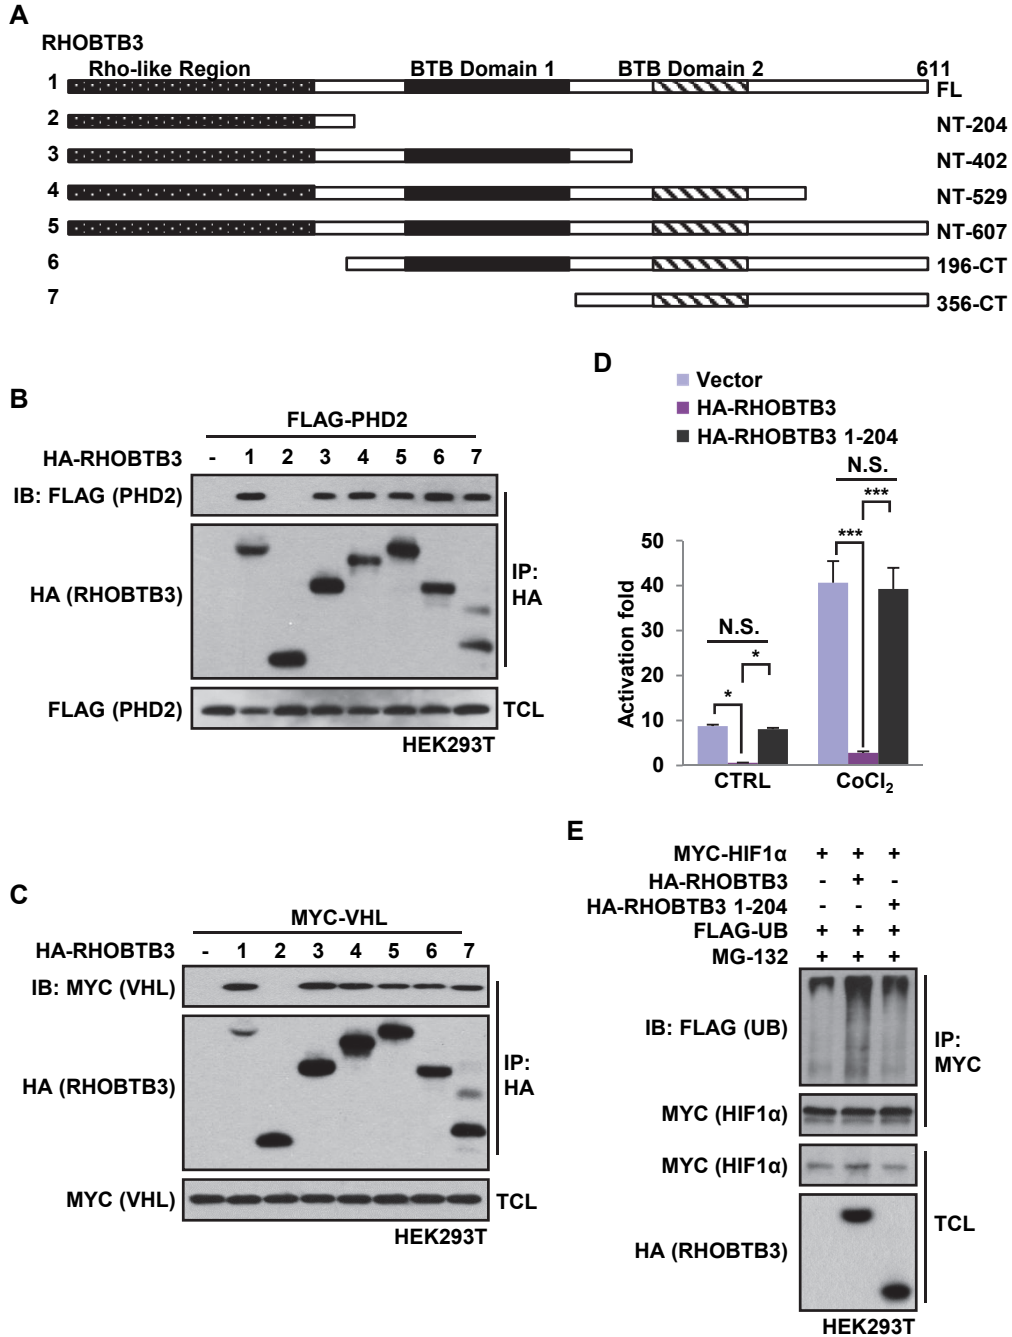

#### Supplementary information, Figure S4

(A) Schematic diagrams represent the full-length RHOBTB3 protein and its different deletion mutants used in the domain mapping experiments.

(B, C) RHOBTB3 interacts with PHD2 (B) and VHL (C) through its C terminus. FLAG-PHD2 (B) or MYC-VHL (C) was co-transfected with the blank vector pCMV-HA, different HA-tagged full-length RHOBTB3 or its deletion mutants into HEK293T cells. Cell lysates were immunoprecipitated using anti-HA antibody. Immunoprecipitates were analyzed by immunoblotting with antibodies indicated.

(D) The N-terminal region of RHOBTB3 (aa 1-204) has no effect on the transcriptional activity of HIF1 $\alpha$ . *RHOBTB3*<sup>-/-</sup> MEFs were infected with lentiviruses expressing HA-RHOBTB3 or HA-RHOBTB3 (aa 1-204). At 36 h post-infection, cells were treated with CoCl<sub>2</sub> for 8 h and the transcriptional activities in the cell lysates were determined as described in Figure 2E. Data are presented as mean  $\pm$  SEM, n = 3 for each group, \*p < 0.01, \*\*\*p < 0.001 (ANOVA followed by Tukey). N.S., not significant.

(E) The N-terminal region of RHOBTB3 (aa 1-204) does not enhance the ubiquitination of HIF1 $\alpha$ . HEK293T cells were transfected with indicated combinations of MYC-HIF1 $\alpha$ , HA-RHOBTB3, HA-RHOBTB3 (aa 1-204) and FLAG-ubiquitin (UB). At 8 h post-transfection, cells were treated with 10  $\mu$ M MG-132 for 10 h, followed by IP and analyzed as described in Figure 2G.
