# Supplementary material for: RHOBTB3 promotes proteasomal degradation of HIFα through facilitating hydroxylation and suppresses the Warburg effect
Source: PubMed Central journal article supplement — Cell Res. 2015 Jul 28;25(9):1025–42. doi: 10.1038/cr.2015.90 (PMC4559813; doi:10.1038/cr.2015.90), 2015-07-28
Supplement: cr201590x5.pdf [file cr201590x5.pdf]

**A**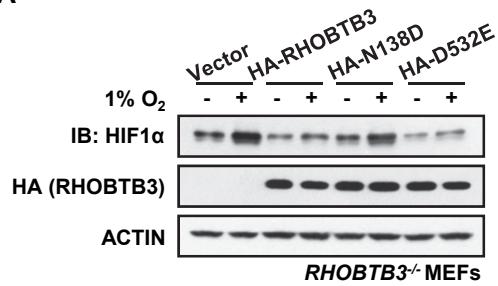**B**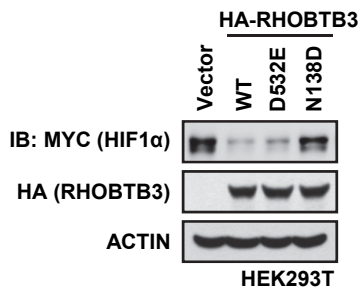**C**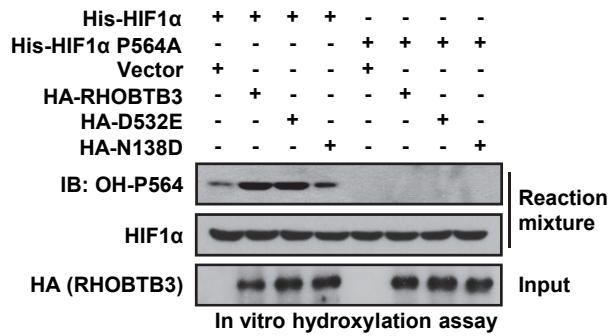**F**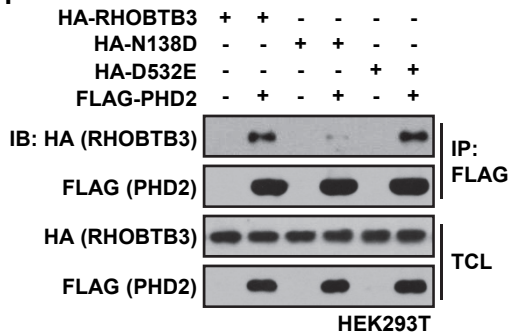**D**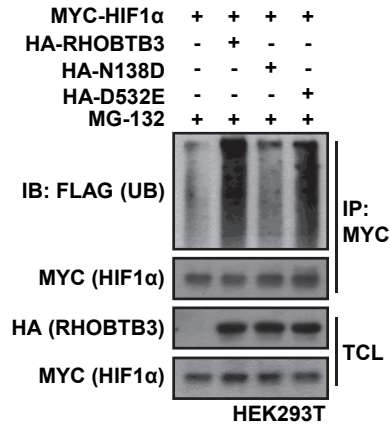**E**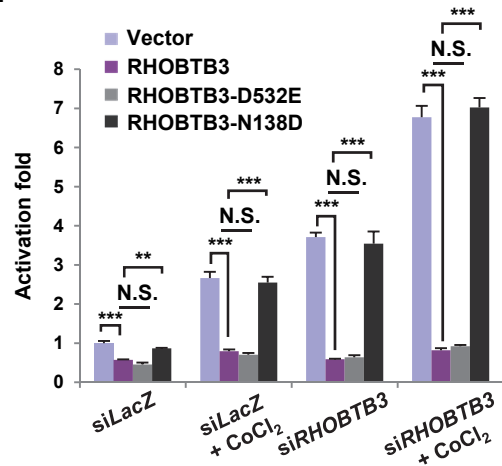**G**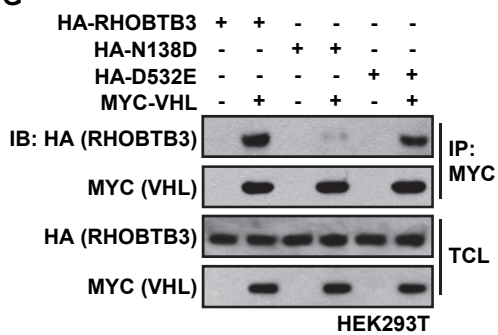

#### Supplementary information, Figure S5

**(A)** The N138D mutant of RHOBTB3 fails to downregulate endogenous HIF1 $\alpha$ . *RHOBTB3*<sup>-/-</sup> MEFs were infected with blank lentivirus (vector) or lentivirus expressing various HA-RHOBTB3 proteins. At 36 h post-infection, cells were maintained in normoxia or exposed to hypoxia (1% O<sub>2</sub>) for 8 h, followed by lysis and immunoblotting with antibodies indicated.

**(B)** RHOBTB3 N138D mutant fails to downregulate ectopically HIF1 $\alpha$ . HEK293T cells were transfected with different combinations of MYC-tagged HIF1 $\alpha$  and HA-tagged RHOBTB3 (WT or mutant). At 16 h post-infection, cells were lysed, followed by immunoblotting with antibodies indicated.

**(C)** RHOBTB3 N138D mutant fails to promote hydroxylation of HIF1 $\alpha$ . *RHOBTB3*<sup>-/-</sup> MEFs were infected with blank lentivirus (vector) or the virus expressing HA-tagged RHOBTB3 (WT or mutant). Following lysis, cell lysates were incubated with nickel affinity resin-bound, bacterially expressed His-HIF1 $\alpha$  (aa 401-603) or its P564A mutant for 90 min at 30 ° C. The mixtures were then added with an equal volume of 2  $\times$  SDS buffer, followed by immunoblotting with antibodies indicated.

**(D)** RHOBTB3 N138D mutant fails to promote ubiquitination of HIF1. HEK293T cells were transfected with different combinations of MYC-tagged HIF1 $\alpha$ , FLAG-tagged UB and HA-tagged RHOBTB3 (WT or mutant). At 16 h post-transfection, cells were treated with 10  $\mu$ M MG-132 for another 10 h, and were then lysed with RIPA buffer containing 1% SDS and boiled. The protein extracts were diluted with RIPA buffer without SDS to a final concentration of 0.2% SDS, and were subjected to IP with antibody against MYC for HIF1 $\alpha$ , followed by immunoblotting with antibodies indicated.

**(E)** RHOBTB3 N138D mutant does not downregulate the transcriptional activity of HIF1 $\alpha$ . HEK293T cells were transfected with HA-tagged RHOBTB3 (WT or mutant). After 12 h, cells were treated with 200  $\mu$ M CoCl<sub>2</sub> for another 8 h, and then lysed; the luciferase activities driven by the hypoxic response element (HRE-Luc) were measured and normalized to a Renilla luciferase (dual luciferase assay system). Data are presented as mean  $\pm$  SEM, n = 3 for each group, \*\*\*p < 0.001 (ANOVA followed by Tukey); N.S., not significant.

**(F, G)** RHOBTB3 N138D mutant fails to interact with PHD2 (**F**) or VHL (**G**). HEK293T cells were transfected with different combinations of HA-RHOBTB3 (WT and mutants), FLAG-PHD2 (**F**) and MYC-VHL (**G**). Protein extracts were immunoprecipitated and immunoblotted with antibodies indicated.
