# Supplementary material for: RHOBTB3 promotes proteasomal degradation of HIFα through facilitating hydroxylation and suppresses the Warburg effect
Source: PubMed Central journal article supplement — Cell Res. 2015 Jul 28;25(9):1025–42. doi: 10.1038/cr.2015.90 (PMC4559813; doi:10.1038/cr.2015.90), 2015-07-28
Supplement: cr201590x6.pdf [file cr201590x6.pdf]

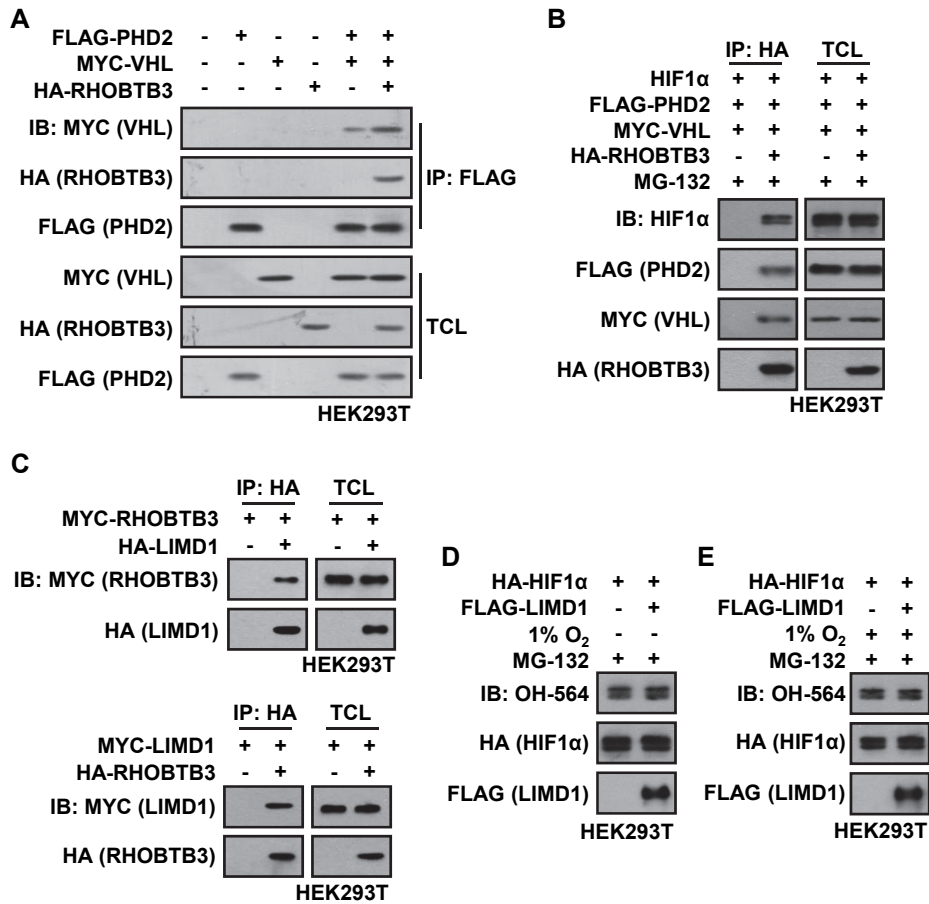

### Supplementary information, Figure S6

(A) Ectopically expressed RHOBTB3 promotes the interaction between PHD2 and VHL. HEK293T cells were transfected with HA-RHOBTB3, MYC-VHL and FLAG-PHD2 in different combinations. At 16 h post-transfection, cells were lysed and the protein extracts were immunoprecipitated with antibody against FLAG, followed by immunoblotting with antibodies indicated.

(B) Ectopically expressed RHOBTB3 interacts with PHD2, VHL and HIF1 $\alpha$ . HEK293T cells were transfected with HA-RHOBTB3, MYC-VHL, FLAG-PHD2 and HIF1 $\alpha$  in different combinations. At 8 h post-transfection, cells were treated with 10  $\mu$ M MG-132 for 10 h then lysed. The protein extracts were immunoprecipitated with antibody against HA, followed by immunoblotting with antibodies indicated.

(C) Ectopically expressed RHOBTB3 interacts with LIMD1. HEK293T cells were transfected with MYC- or HA-tagged RHOBTB3 and/or MYC- or HA-tagged LIMD1 in different combinations. IP was performed, followed by immunoblotting with antibodies indicated.

(D, E) LIMD1 does not promote the hydroxylation of HIF1 $\alpha$ . HEK293T cells were transfected with HA-RHOBTB3 and/or HIF1 $\alpha$ . At 8 h post-transfection, cells were treated with 10  $\mu$ M MG-132 and maintained under normoxia (D) or exposed to hypoxia (E) for 10 h. The protein extracts in the cell lysates were immunoblotted with antibodies indicated.
