# Supplementary material for: RHOBTB3 promotes proteasomal degradation of HIFα through facilitating hydroxylation and suppresses the Warburg effect
Source: PubMed Central journal article supplement — Cell Res. 2015 Jul 28;25(9):1025–42. doi: 10.1038/cr.2015.90 (PMC4559813; doi:10.1038/cr.2015.90), 2015-07-28
Supplement: cr201590x7.pdf [file cr201590x7.pdf]

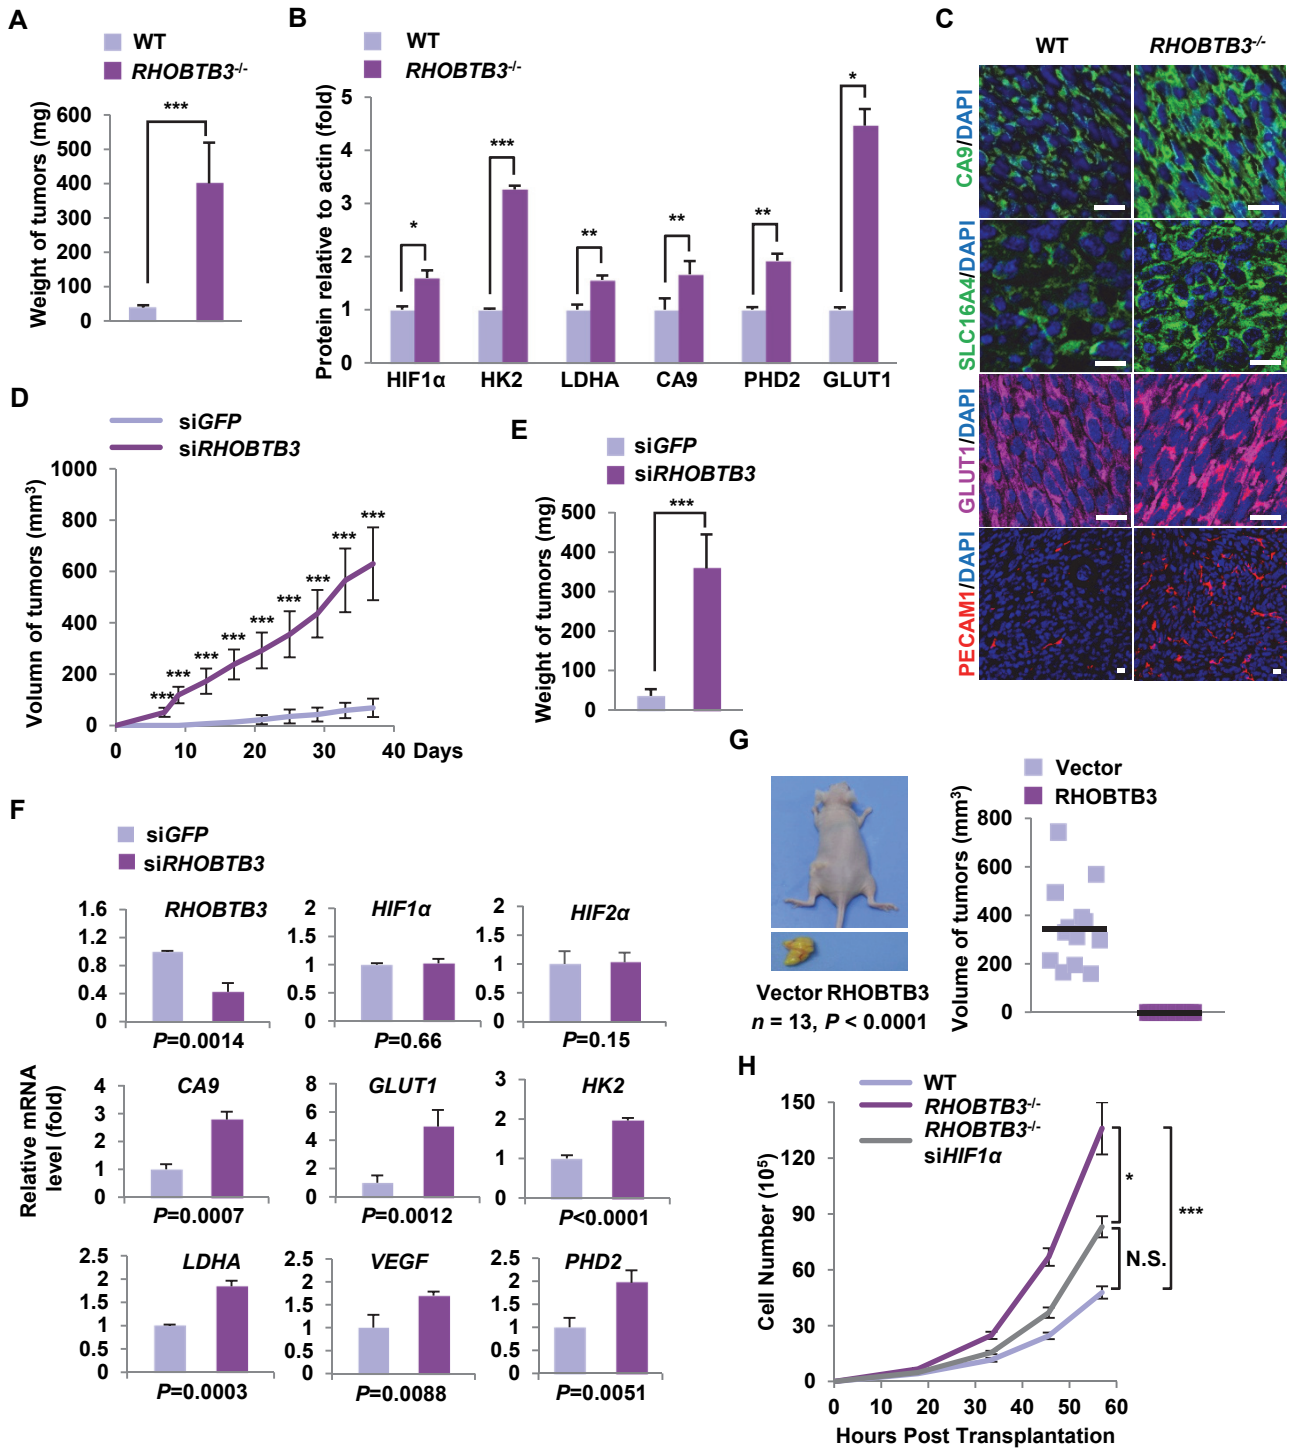

#### Supplementary information, Figure S7

- (A) The sizes of xenografts derived from *RHOBTB3*<sup>-/-</sup> MEFs are overwhelmingly larger than those derived from control MEFs. The weight of tumors (Figure 7B) are presented as mean  $\pm$  SEM, n = 11 for each group, \*\*\*p < 0.001 (Student's *t*-test).
- (B) Relative protein levels of HIF1 $\alpha$ , HK2, LDHA, CA9, PHD2 and GLUT1 in xenografts derived from WT or *RHOBTB3*<sup>-/-</sup> MEFs as shown in Figure 7C. Relative protein levels were calculated from densitometry performed on developed films and normalized to ACTIN. Data are presented as mean  $\pm$  SEM, n = 5 for each group, \*p < 0.05, \*\*p < 0.01, \*\*\*p < 0.001 (Student's *t*-test); N.S., not significant.
- (C) Immunostaining for CA9, solute carrier family 16 member 4 (SLC16A4), GLUT1 and platelet/endothelial cell adhesion molecule 1 (PECAM1) in xenografts derived from *RHOBTB3*<sup>-/-</sup> MEFs and WT MEFs. Scale bar, 10  $\mu$ m.
- (D) Knockdown of *RHOBTB3* accelerates xenograft growth. The volumes of tumors described in Figure 7D were recorded day by day until day 37. Tumor volumes were calculated as described in Figure 7B. Data were presented as mean  $\pm$  SEM, n = 12 for each group, \*\*\*p < 0.001 (ANOVA followed by Tukey).
- (E) The weights of xenografts derived from *RHOBTB3*-knockdown HeLa cells are increased in comparison with that derived from control MEFs. The weights of tumors described in Figure 7D were presented as mean  $\pm$  SEM, n = 12 for each group, \*\*\*p < 0.001 (Student's *t*-test).
- (F) The mRNA levels of HIF target genes are up-regulated in xenografts derived from *RHOBTB3*-knockdown HeLa. Xenografts derived from *RHOBTB3*-knockdown HeLa and the control HeLa cells described in Figure 7D were homogenized and total RNAs were purified, followed by real-time PCR analysis. Values are presented as mean  $\pm$  SEM, n = 6 for each group. Statistical analysis was done by Student's *t*-test.
- (G) Overexpression of *RHOBTB3* strongly suppresses xenograft growth. Suspensions of WT HeLa cells or HeLa cells stably expressing *RHOBTB3* ( $3 \times 10^6$  each) were injected intradermally into each flank of nude mice. Tumors were allowed to develop for 35 days and the volumes were calculated as described in Figure 7B. Values of tumor volumes are presented as mean  $\pm$  SEM, n = 13 for each group, p < 0.0001 (Student's *t*-test).
- (H) *RHOBTB3* suppresses cell proliferation through HIF1 $\alpha$ . *RHOBTB3*<sup>-/-</sup> *siHIF1 $\alpha$*  MEFs were established by infecting *RHOBTB3*<sup>-/-</sup> MEFs with lentivirus carrying siRNA against *HIF1 $\alpha$*  for 36h. MEFs were cultured and the numbers of viable cells were determined by trypan blue exclusion assay. Values are presented as mean  $\pm$  SEM, n = 3 for each group, \*p < 0.05, \*\*\*p < 0.001 (ANOVA followed by Tukey), N.S., not significant.
