# Supplementary material for: RHOBTB3 promotes proteasomal degradation of HIFα through facilitating hydroxylation and suppresses the Warburg effect
Source: PubMed Central journal article supplement — Cell Res. 2015 Jul 28;25(9):1025–42. doi: 10.1038/cr.2015.90 (PMC4559813; doi:10.1038/cr.2015.90), 2015-07-28
Supplement: cr201590x8.pdf [file cr201590x8.pdf]

## Supplementary information, Data S1

### Supplemental Experimental Procedures

#### Plasmids

Full-length cDNAs encoding human RHOBTB3, LIMD1, PHD2 and VHL (VHL30, VHLp24) were obtained by PCR using cDNA purified from HEK293T cells. Point mutations of HIF1 $\alpha$  were performed by a PCR-based site-directed mutagenesis method using Pfu polymerase (Stratagene). DNA fragments amplified by PCR were verified by sequencing (Invitrogen, China). Expression plasmids for various proteins were constructed in the pCMV5 or pcDNA3.3 vector for transient transfection or in pBOBI for lentivirus packaging (stable expression). The lentivirus-based vector pLL3.7 was used for expression of siRNA in HEK293T. The 19-nucleotide sequence for siRNA against human *RHOBTB3* in pLL3.7 is 5'-GCCATGAATCTTCAGGCAA-3', 5'-GGAACAAGAAAGCTAATAA-3' for human *PHD2*, 5'-GCCUGAGAAUACAGGAGA-3' for human *VHL*, and 5'-GAGCAGAGGATCAGGCCAT-3' for mouse *LIMD1*. The siRNAs against human *LIMD1* (si*LIMD1*-A) was constructed as described previously [58]. The details of the primer sequences used for constructing point mutants and deletion mutants are available upon request.

#### Antibodies and drugs

Mouse anti-HA (cat. sc-7392), anti-LIMD1 (cat. sc-271448), goat anti-PDK1 (cat. sc-7140), rabbit anti-VHL (cat. sc-5575, used to immunoblot endogenous human VHL),

and anti-SLC16A4 (cat. sc-50329) antibodies were purchased from Santa Cruz Biotechnology. Mouse anti-MYC (cat. #2276), Rabbit anti-HIF1 $\alpha$ -OH-564 (cat. #3434), anti-PHD2 (cat. #4835), anti-HIS (cat. #2365), anti-GST (cat. #2625), anti-HK2 (cat. #2867), anti-HSP90 (cat. #4877), anti-LDHA (cat. #2012), and anti-GLUT1 (cat. 12939) antibodies were purchased from Cell Signaling Technology. Rabbit anti-HIF2 $\alpha$  (cat. ab73895), anti-HIF3 alpha (cat. ab10134), anti-hydroxyproline (cat. ab37067), anti-PHD3 (cat. ab30782), Anti-PHD1 (cat. ab113077) and anti-PECAM1 (cat. ab28364) antibodies were purchased from Abcam. Rabbit anti-RHOBTB3 (cat. 19014-1-AP) and anti-HIF1 $\alpha$  (cat. 20960-1-AP, used to detect endogenous mouse HIF1 $\alpha$ ) antibodies were purchased from Proteintech. Rabbit anti-CA9 (cat. NB100-417) was purchased from Novus. Mouse anti-VHL (cat. MABC14, used to immunoprecipitate endogenous human VHL from HEK293T) antibody was purchased from EMD Millipore. Mouse anti-FLAG (cat. F1804) and anti- $\beta$ -ACTIN (cat. A1978) antibodies were purchased from Sigma. Mouse anti-HIF1 $\alpha$  (cat. 601959, used to detect endogenous human HIF1 $\alpha$ ) antibody was purchased from BD Biosciences. MG-132 (sc-201270) was purchased from Santa Cruz Biotechnology. CoCl<sub>2</sub> (cat. C8661), Chloroquine diphosphate salt (cat. C6628) and FLAG peptide (cat. F3290) were purchased from Sigma. RHOBTB3 (cat. ab161438) protein was purchased from Abcam. Protease inhibitor cocktail was purchased from Roche.

### **Quantitative real-time PCR**

Total RNAs from MEFs and tumors were extracted with Trizol reagent. The cDNA was then synthesized using M-MLV RTase system. The analyses were performed using Step One Plus, the fast Real-Time PCR System from ABI (Applied Biosystems). 18S rRNA was used as endogenous control for samples. Details of primers for each analyzed human and mouse gene are listed in the following tables:

#### Human genes

| Gene           | Accession Number | Primer Sequence (5'-3')                                 | Product Length |
|----------------|------------------|---------------------------------------------------------|----------------|
| 18S rRNA       | NR_003286.2      | F: CGGCTACCACATCCAAGGAA<br>R: GCTGGAATTACCGCGGCT        | 187 bp         |
| <i>HIF1A</i>   | NM_001243084.1   | F: CCATTAGAAAGCAGTTCCGC<br>R: TGGGTAGGAGATGGAGATGC      | 194 bp         |
| <i>RHOBTB3</i> | NM_014899.3      | F: GCTTGCCGATGTTGTCTTCG<br>R: CAGGAGACACATGGCCTGG       | 232 bp         |
| <i>CA9</i>     | NM_001216.2      | F: TAAGCAGCTCCACACCCTCT<br>R: TCTCATCTGCACAAGGAACG      | 250 bp         |
| <i>VEGFA</i>   | NM_001171623.1   | F: AGGAGGAGGGCAGAATCATCA<br>R: CTCGATTGGATGGCAGTAGCT    | 76 bp          |
| <i>GLUT1</i>   | NM_006516.2      | F: GATTGGCTCCTTCTCTGTGG<br>R: TCAAAGGACTTGCCCAGTTT      | 129 bp         |
| <i>BNIP3</i>   | NM_004052.2      | F: CAGGGCTCCTGGGTAGAACT<br>R: CTCCGTCCAGACTCATGCTG      | 128 bp         |
| <i>VHL</i>     | NM_198156.2      | F: GACCTGGAGCGGCTGACA<br>R: TACCATCAAAGCTGAGATGAAACA    | 101 bp         |
| <i>EPAS1</i>   | NM_001430.4      | F: GTCTCTCCACCCCATGTCTC<br>R: GGTCTTCATCCGTTTCCAC       | 217 bp         |
| <i>PHD2</i>    | NM_022051.2      | F: GCACGACACCGGGAAGTT<br>R: CCAGCTTCCCGTTACAGT          | 176 bp         |
| <i>LDHA</i>    | NM_001165416.1   | F: GGCCTGTGCCATCAGTATCT<br>R: GCCGTGATAATGACCAGCTT      | 189 bp         |
| <i>HK2</i>     | NM_000189.4      | F: TCCGTAACATTCTCATCGATTCAT<br>R: TGTCTTGAGCCGCTCTGAGAT | 74bp           |

## Mouse genes

| Gene         | Accession Number | Primer Sequence (5'-3')                               | Product Length |
|--------------|------------------|-------------------------------------------------------|----------------|
| 18S rRNA     | NM_011296.2      | F: CATTAAGGGCGTGGGGCGGAG<br>R: CATGATGGTGATCACTCGC    | 118 bp         |
| <i>HIF1A</i> | NM_010431.2      | F: CAAGATCTCGGCGAAGCAA<br>R: GGTGAGCCTCATAACAGAAGCTTT | 113 bp         |
| <i>HIF2A</i> | NM_010137.3      | F: AGTAGCCTCTGTGGCTCCAA<br>R: TCCAGGGCATGGTAGAACTC    | 230 bp         |
| <i>GLUT1</i> | NM_011400.3      | F: ACTGGGCAAGTCCTTTGAGA<br>R: GTCTAAGCCAAACACCTGGGC   | 190 bp         |
| <i>LDHA</i>  | NM_001136069.2   | F: GCTCCCCAGAACAAGATTACAG<br>R: TCGCCCTTGAGTTTGTCTTC  | 131 bp         |

## Protein expression

HIF1 $\alpha$  (401-603aa) and its P564A mutant were cloned into pET-28a vector and were used for transformation the E. coli strain BL21 (DE3). The protein expression of transformed cells was induced with 0.1 mM IPTG at an optical density of 0.8 at 600 nm. After growing for 16 h at 20 °C, the cells were collected and the expressed protein was purified with HIS-Select Nickel Affinity Gel (Sigma) through regular procedures. The protein-bound gel was then collected and stored in -80 °C with 20% glycerol for further use.

## Immunohistochemistry

Sections were deparaffinized and rehydrated, and antigen retrieval was performed in

10 mM citric acid and 2 mM EDTA (pH 6.0). The sections were then blocked in 10% goat serum in PBS at 37 °C for 1 h, and were then incubated in different primary antibodies (1:100 in 10% goat serum, 4 °C, overnight), followed by incubation with fluorescent labeled-secondary antibodies (1:500 in PBS, room temperature, 2 h). The nuclei were stained with 1 µg/ml DAPI (Invitrogen, D21490) in PBS for 5 min at room temperature, and imaged on an Axio Imager A2 (Zeiss).

### **Immunofluorescence**

*Rhobtb3*<sup>-/-</sup> MEFs were fixed on glass cover slips with 3.7% paraformaldehyde at room temperature after the treatment indicated in figure legends. Cells were washed three times with PBS followed by incubation with 0.5% NP-40 in PBS for 5 min. Subsequently, cells were blocked with PBS containing 5% (w/v) BSA for 20 min and incubated with anti-mouse HA antibody (sc-7392, Santa Cruz Biotechnology) or anti-rabbit VHL antibody (ab135576, Abcam) overnight at 4 °C. Excess antibodies were removed by washing the cells three times with PBS. This was followed by a 7-8 h incubation with secondary antibody (Alexa Fluor 488 and Alexa Fluor 594) in the dark at 4 °C. Subsequently the cells were further washed three times with PBS before mounting the cover slips on a glass slide with mounting media containing DAPI. Cells were later imaged on a Zeiss Laser Scanning Microscope (LSM) 780.

### **Supplemental References**

81 Li Q, Lin S, Wang X *et al.* Axin determines cell fate by controlling the p53 activation threshold after DNA damage. *Nature cell biology* 2009; **11**:1128-1134.
